# Supplementary material for: Identification of a RNA-Seq based prognostic signature with five lncRNAs for lung squamous cell carcinoma
Source: PubMed Central journal article supplement (PMC5584202; doi:10.18632/oncotarget.17098), 2017-04-13
Supplement: oncotarget-08-50761-s001.pdf [file oncotarget-08-50761-s001.pdf]

## Identification of a RNA-Seq based prognostic signature with five lncRNAs for lung squamous cell carcinoma

### Supplementary Materials

**Supplementary Table 1: Validation of the expression of ZNF503-AS1 based on GEO datasets**

| Study    | LUSC     |          |          | Normal   |          |          | <i>t</i> -test |          |
|----------|----------|----------|----------|----------|----------|----------|----------------|----------|
|          | <i>n</i> | Mean     | SD       | <i>n</i> | Mean     | SD       | <i>t</i>       | <i>P</i> |
| GSE19188 | 27       | -0.37698 | 0.281843 | 65       | 0.11456  | 0.334677 | 6.702          | < 0.001  |
| GSE30219 | 61       | 5.079881 | 0.450755 | 14       | 5.451717 | 0.471456 | 1.728          | 0.088    |
| GSE33479 | 14       | 0.725709 | 0.748462 | 27       | 1.329858 | 1.042678 | 1.921          | 0.062    |
| GSE37745 | 66       | 5.727597 | 0.616864 |          |          |          |                |          |
| GSE50081 | 43       | 4.310211 | 0.521205 |          |          |          |                |          |
| GSE73403 | 69       | 7.271944 | 0.392556 |          |          |          |                |          |
| GSE74706 | 8        | -1.58171 | 1.840449 | 8        | 0.489941 | 0.505099 | 2.936          | 0.022    |
| GSE74777 | 107      | 3.547633 | 0.183529 |          |          |          |                |          |
